# Supplementary material
Source: Springer Nature journal article supplement (https://www.springermedizin.de/resource/supplementary/12936_2012_2116_MOESM1_ESM.pdf/9542492)
Supplement: MOESM1 [file 9542492]

### Additional file 1 Specific *var* gene primers used for Q-RT PCR.

| Target gene       | Forward primer             | Reverse primer              |
|-------------------|----------------------------|-----------------------------|
| IT4var01          | TGCAATGTAACACACTCACG       | CACTATACCACAGGCATCTTC       |
| IT4var02*         | GTGCCACTACAGCTTATAGTACC    | GCATATTCTTTGTGCGTTGTCTTTCC  |
| IT4var03*         | ACATAGTGGATTGACAGGTGGTG    | GGCTTTCCATACTTGATCTCTGTTCCG |
| IT4var04          | CACGACATTAACAATACATGCAGA   | CATTGCATTACACAGACATTGG      |
| IT4var05          | GGTAGTGACGAACTGTTGG        | ACTTAACTTTTCGCACGGATAC      |
| IT4var06          | GTAACATATCCAAAGGATGAACGTCG | CCCATCTATCTTTACAAGGATGCTCC  |
| IT4var07*         | CATCCTTGCGCTGGTAGAAACAAAAC | ATTGCCTCCTGCGATAAGGAGCAC    |
| IT4var08*         | CGAATCGTAATACTAGTCGTTCAAG  | GGAGGCATATAAGCTTCATTCTCTG   |
| IT4var09          | GCAAGGGCAATTTGGATGATG      | GGAGTCGAGATTACGTTTGTTAC     |
| IT4var10          | GGTATCCGTGCAAAGAGTTAAGTAG  | GCACATGCTCCTATACCATCCC      |
| IT4var11          | CAATGAAAGTCGTAGTGCTCCTAAC  | GCTACTCTGTGATGTTCTATCATTCC  |
| IT4var12/AAB06961 | CAAACGATCATTCCAATGCTAAACG  | CCGCAGGTTTCCATCCATCTTC      |
| IT4var13          | TCGGGCAACAACACTATCAA       | CCCCATTCAATAAACCATCG        |
| IT4var14          | AAACCGACACAACAACCGACGACGAC | ACTATTTTCGCACGCATCTGGTGGC   |
| IT4var15          | TGGTGAAGCCGCCATGTGACATAG   | TAGTTGGTATGCAACGCCAGCCGTAG  |
| IT4var16          | ACCGGAAGCACCAACAAGAAC      | GCACCACTTATGCATTTCCATCC     |
| IT4var17          | ACATTTGTCCGCAAACATCA       | AGGTGTTGTCCGTGTTCTCC        |
| IT4var18*         | GCAAGAAGGTGAAGGATCATATAGG  | GCCATCATGACCCTCCTTAAAC      |
| IT4var19/32a/32b  | TGGTGGTAACACGGAGTCAA       | AAGGTTTGGGGGTTTTGTTC        |
| IT4var19/32b      | TGTGACTGACTACAGTGATGCCAAAC | TGATGCTTCTGACAAACGTCCTTGC   |
| IT4var20          | ACCAACAAGACTGCCAAGGA       | CCATGAAATTTTGCTTGTGA        |
| IT4var21          | TTGAAAATCCGGAGAATCTTTG     | GGCTGGTACCCTATTTTCGTC       |
| IT4var22          | CGTAAATACCCTTATGACCATGC    | GGGTTACAATGATCTATTGCCTG     |
| IT4var23          | ATCAACACCACCAAGACCTCGACCAC | CTGTAAACGCAATGCCAACACTCCAG  |
| IT4var24          | AAATCTGAATGCAGCGTGTGACC    | TTCAACTCCACCCTTACCTGCCTC    |
| IT4var25          | AAAGACGGCACTACTCTCCAAGCAGC | TCGTCTCCTTGGTGGCACACATATGG  |
| IT4var26          | GAGCACGAGGTAAGTTGCGTTATG   | CTAGCACCACCACCTGATATTTCTG   |
| IT4var27          | CTGCAGGTGGGGATGATATT       | AACGTCCTTGCAAGCCTTTA        |
| IT4var28          | TTGAGTGGATAGATAAGCAACG     | CATAATTAGTAGCAGTTTCTCCACC   |
| IT4var29          | GCGAATGGGAACCTAATGAC       | CGGTTACACCAGCTTCTGCT        |
| IT4var30          | GAAGAGACGGTCGCAAAGAC       | TTGGTTGGACAGGCATTTTT        |
| IT4var31          | CAAGATGGCAGCATTGAAAA       | CGCCTCCTTCTGCATCTTAC        |
| IT4var33          | GTACGACGAAGTGAAGAATGGTGAGG | TAATCAAGTCCGCACGGATGAAGGC   |
| IT4var34          | CAACAACAGAGAAGTCAGTAGAC    | CACTACCACTTGATACACATTTCC    |
| IT4var35          | CAACAACAGAATCTGACGTGGGC    | TTTGGATTACAACCCTCTATTCCACC  |
| IT4var36          | ACGTGTTCTGTTTCGTGTGCTCC    | GCAGCTCGTCTTAGCCTCCTAATACC  |
| IT4var39          | CATACTGCCAAGCATGTCCA       | CGACTTTTCTTCTTCTTTGC        |
| IT4var40          | GGTGGTAGTACACAGGATGAAGATG  | TCACTTTACCAAATCTCCTTGC      |
| IT4var41          | GGACATGTCAGGTCATCACG       | ACCATTCTGCCATTACAGTC        |
| IT4var44          | TGAAAGGTATCCGTGTACAGAG     | CACCATTCTTACGATCATTACCTTC   |
| IT4var45          | TTACCGCCTTCGTGGAAAGTGCTG   | TTGTAGTCCCTCCGCTCCTTCTTGTG  |
| IT4var46          | CACCAGTAAATGTGTGCGATATAG   | GATACATATGGCACCTTATCAC      |
| IT4var47          | TGAAAGGAAAGTTGTCACTAGCAAG  | CCACATGGCTTCGTATTACCCTTAG   |
| IT4var51          | TTGGAAGGAAAGTTGTCACTAGCACC | CGAGCAGCAAGTTTCTCACCTTTATC  |

|                            |                              |                              |
|----------------------------|------------------------------|------------------------------|
| IT4var54                   | CCTTACGTTGAGTGGATAGATAACC    | TCAGTACTAATACTACGTGCTCTTC    |
| IT4var58                   | GTGGAGGTTTGCAGCATAGTGGACAG   | TTTCCAGTGGCTTCACCCGTGTTACC   |
| IT4var59                   | GGTCACACCAATGATCCATGC        | CACATTCACCGCCACTTTCTTTAG     |
| IT4var60                   | CCCTTGTA AAAAGTGA ACTCACCA   | CGAGGGGTTTTTCGGATTAT         |
| IT4var61                   | ACCGCAGAAGACACCACAGAAG       | GGTTGCACGCGGCATTCAAATTATTG   |
| IT4var62                   | GCCATGTGAAATAGTGGCTGAAC      | GGCTTCACCACTTGATACACATTTCC   |
| IT4var63                   | AAAGGATACGACATCACTGGAC       | GCCATTTACATATTTGGTTGGACAC    |
| IT4var64                   | GAAATCCTTGCGATGGAAGAAATC     | TGTCGTCTTCTTGGTGGAGC         |
| IT4var65                   | CAACAGCAACACCGAAAGAA         | ACTTCCTCCTTGGCTTTGGT         |
| IT4var66                   | GTGTTCTCTCAAATATGGACCAG      | GACTTTCACTCTCACTACTTGTG      |
| IT4var67                   | CAGCTCTATCACGTAGTTGGAGTG     | GATTAAGCTGGCATGGATCTTCTG     |
| IT4var68                   | GAGCGATTGGTAAATTACGTTATGG    | CACCACCACCACCTGATATTC        |
| Var3Xi                     | CTTAATATCTACGAAGACCCCAACA    | GTAATATCCGTATCATATCTACTTGACG |
| PFA0015cXi                 | CTTAATATCTACGAAGACCCCAACA    | GTAATATCCGTATCATATCTACTTCATG |
| DBL $\alpha$ 1.3var3Global | CGACGTAATCATAGACGTAGAGGTT    | CAAGGGACTCAACTTTACACTCATT    |
| DBL $\epsilon$ 8var3Global | AAGAGGATCTACTTAATGCTGCTTTTAG | AACTGAACTTCATAGCCTCATATGC    |

\*Previously described [45].
